# Supplementary material
Source: PubMed Central journal article supplement (PMC10185663)
Supplement: 42003_2023_4897_MOESM2_ESM.pdf [file 42003_2023_4897_MOESM2_ESM.pdf]

# Supplementary Figure 1

**a**

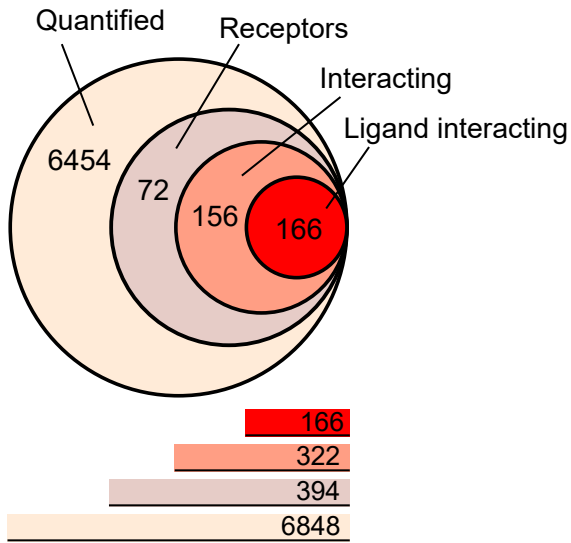

**b**

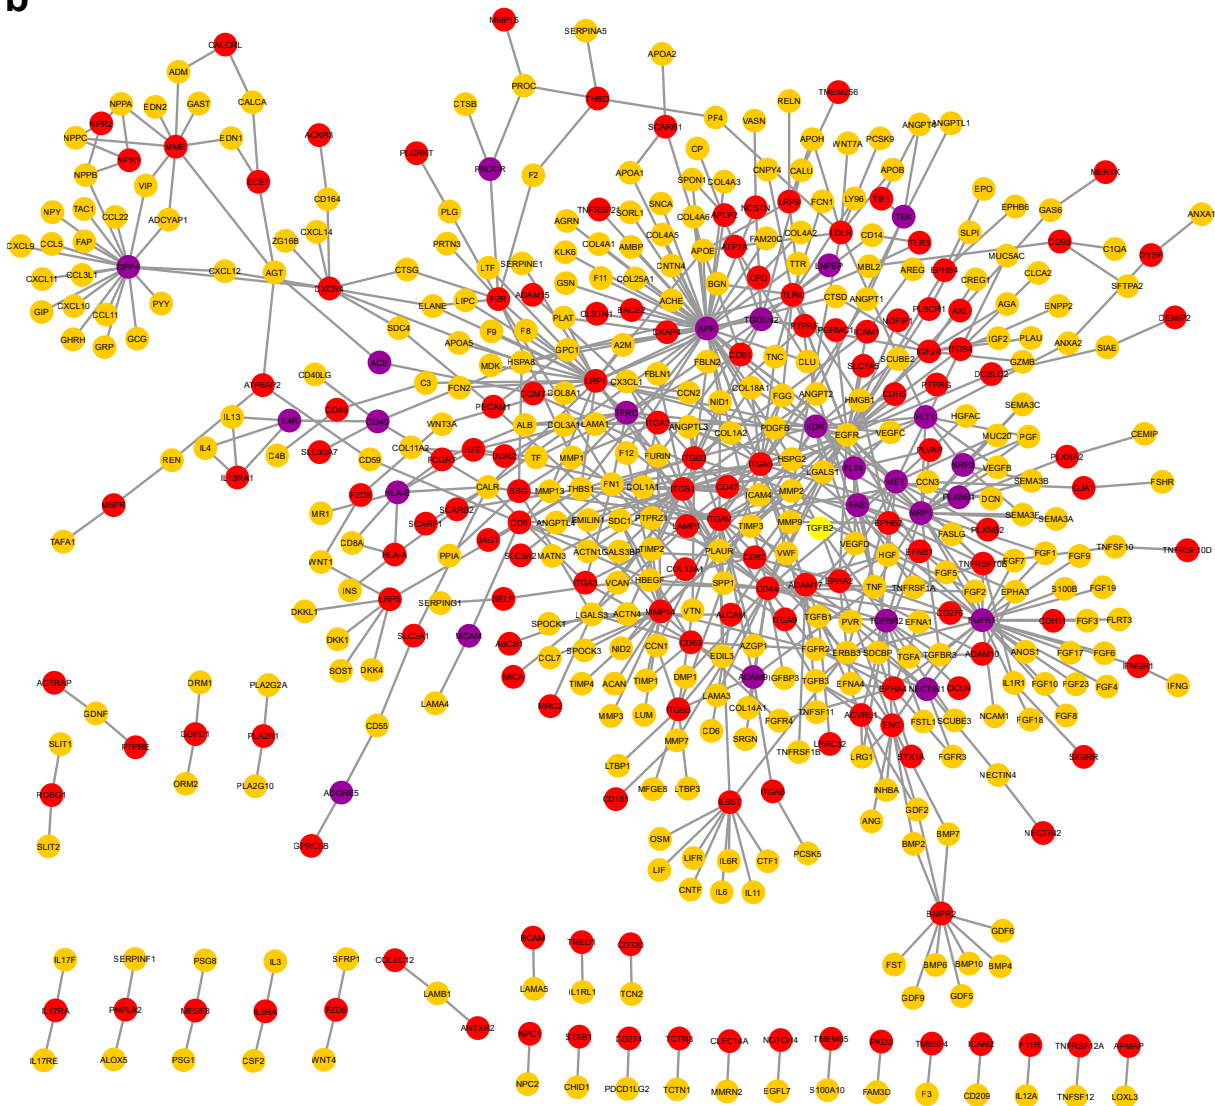

## Supplementary Figure 1: In depth proteome of blood outgrowth endothelial cells

**a** Number of quantified proteins (Quantified), quantified proteins with 'extracellular' or 'GPI-anchor' topology domain Uniprot annotations (Receptors), receptors with STRING-DB interaction scores >0.4 (Interacting) and receptors interacting with Uniprot 'secreted' and 'signal' keywords or GO:CC 'extracellular space' and 'extracellular region' annotated targets (Ligand interacting) are indicated. Bars represent cumulative number of quantifications.

**b** Cytoscape interaction network of receptors and potential ligands (Red dots: receptors, yellow dots: ligands, purple dots: proteins fulfilling both receptor & ligand criteria), edges represent STRING-DB scores, nodes are labeled with protein names.

## Supplementary Figure 2

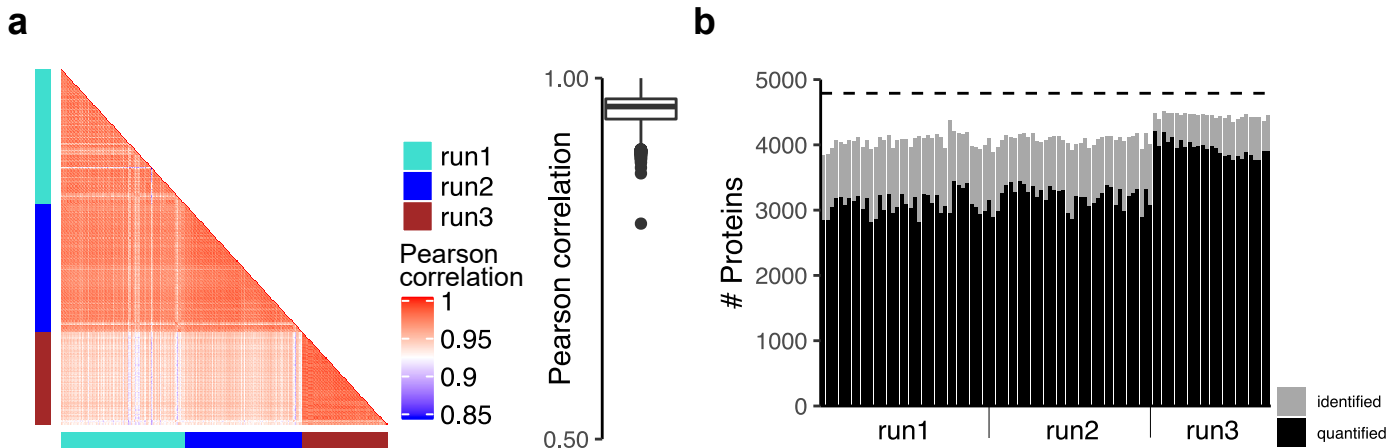

## Supplementary Figure 2: Label free quantitative proteomics of cytokine library screening

**a** Pearson correlation coefficients of cytokine library screening. Color gradient scale represents Pearson correlation coefficients. Separate mass spectrometric runs are indicated (teal: run 1, blue: run 2, brown: run 3). Boxplot shows the overall distribution of Pearson correlation coefficients.

**b** Number of identified (grey bars) and quantified (black bars) proteins.

# Supplementary Figure 3

a

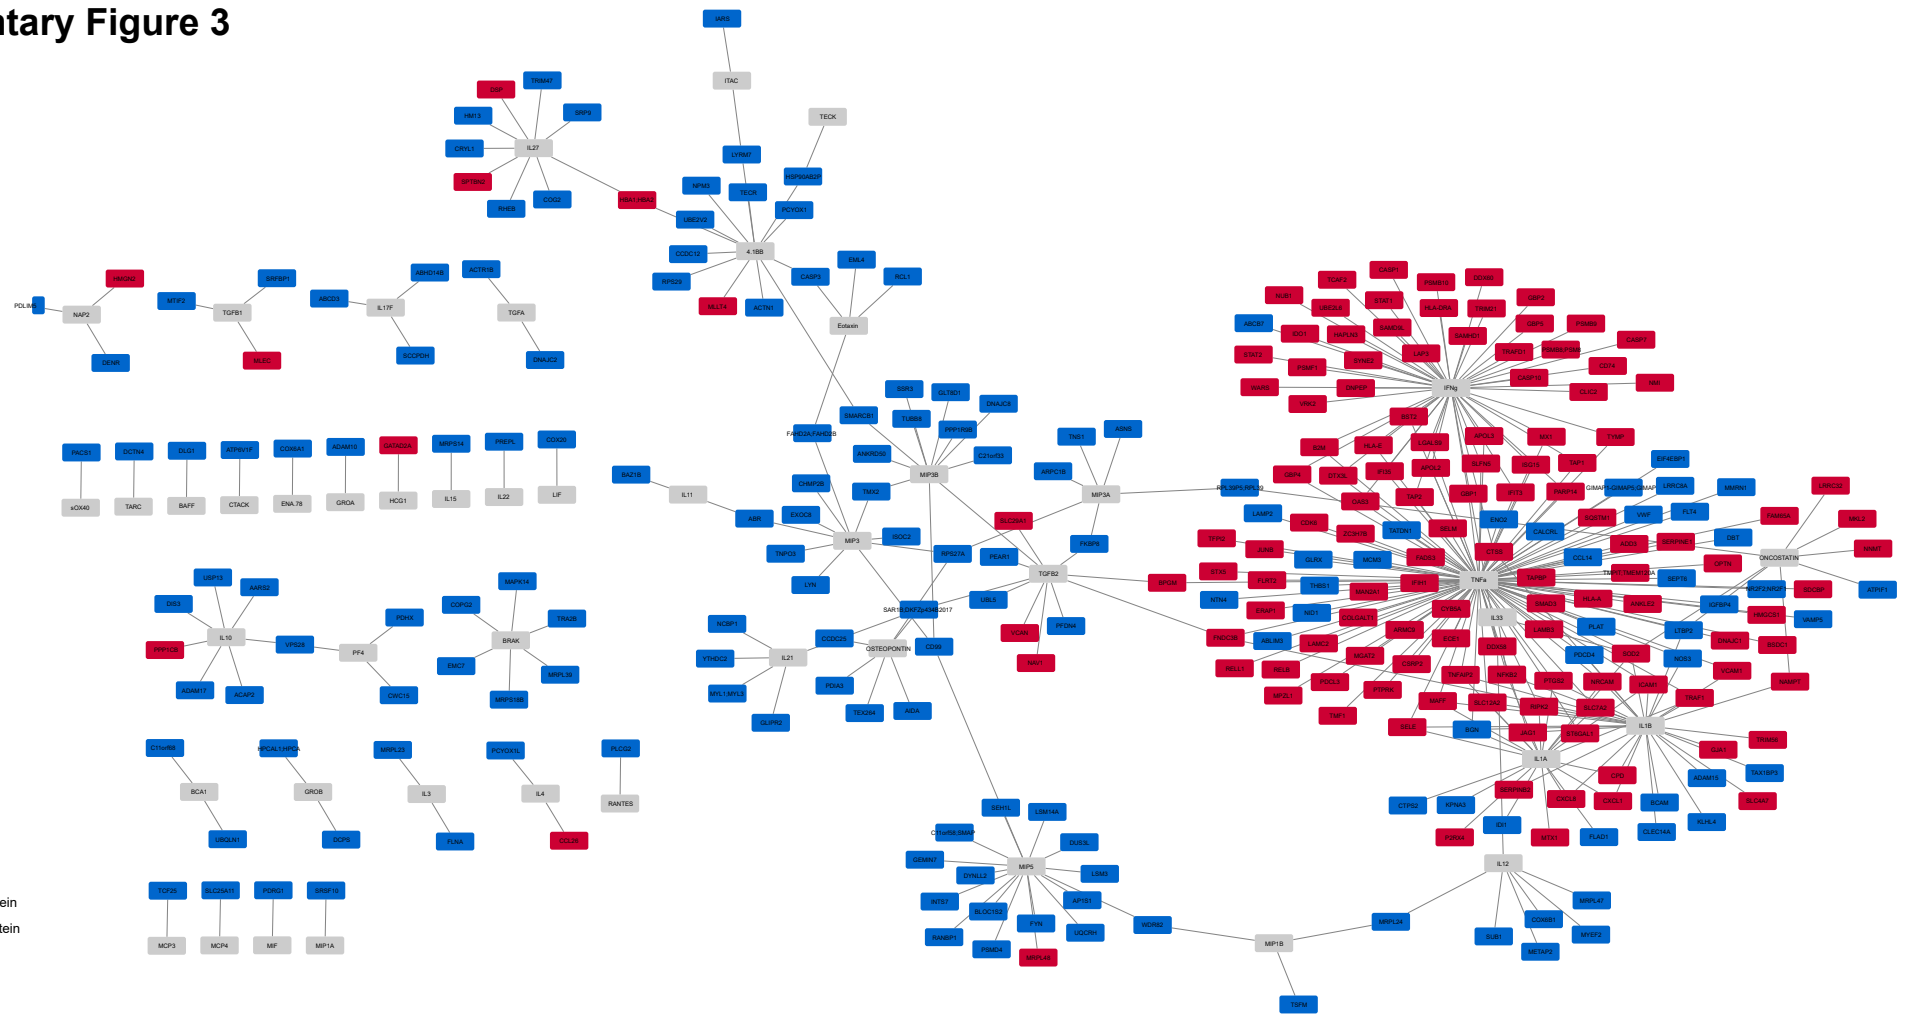

b

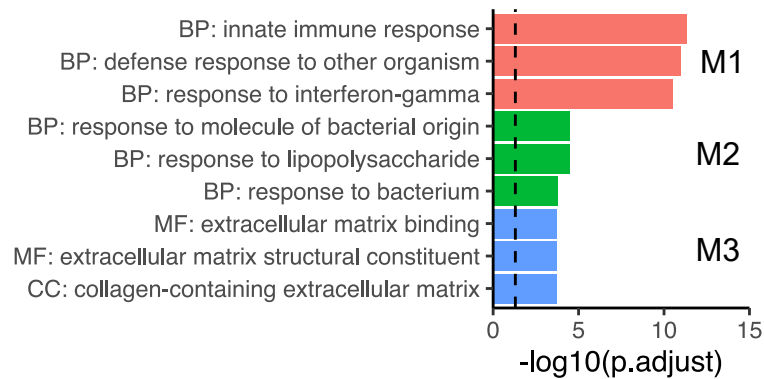

c

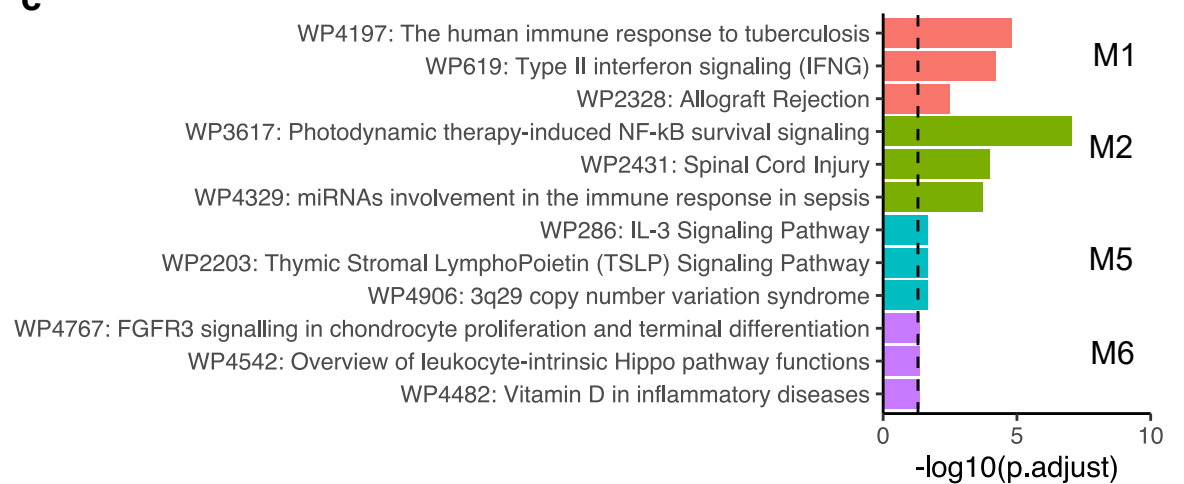

### Supplementary Figure 3: Cytokine-EC proteomic response profiling

**a** Network visualizing connections between cytokine stimuli and statistically significantly abundant proteins. Grey nodes: cytokine stimuli, blue nodes: proteins with reduced abundances, red nodes: proteins with increased abundances.

**b** Bar plot of top 3 enriched GeneOntology terms per module. Colors represent modules as indicated.

**c** Bar plot of top 3 enriched pathways per module based on WikiPathway annotations. Colors represent modules as indicated.

### Supplementary Figure 4

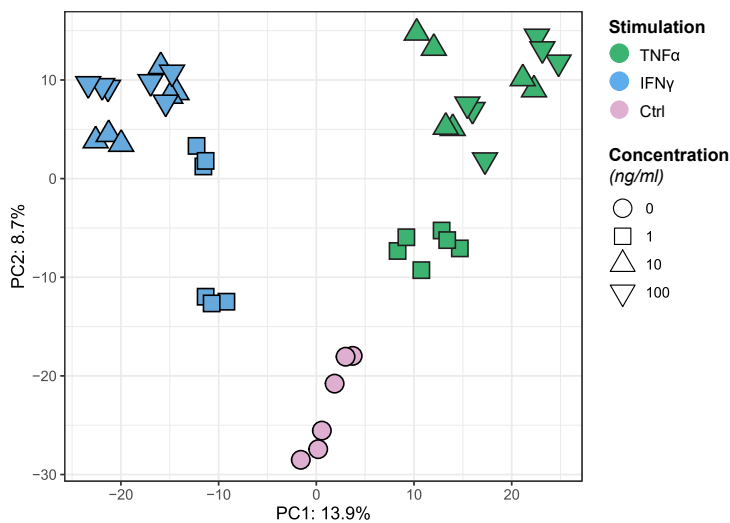

### Supplementary Figure 4: Proteomic profiles of concentration ranges cytokine stimuli

PCA plot of proteomes of unstimulated BOECs (pink circles) or BOECs stimulated with increasing concentrations TNF $\alpha$  (green) and IFN $\gamma$  (blue). Shape indicates concentration 1 ng/ml (square), 10 ng/ml (triangle), 100 ng/ml (upside down triangle).

## Supplementary Figure 5

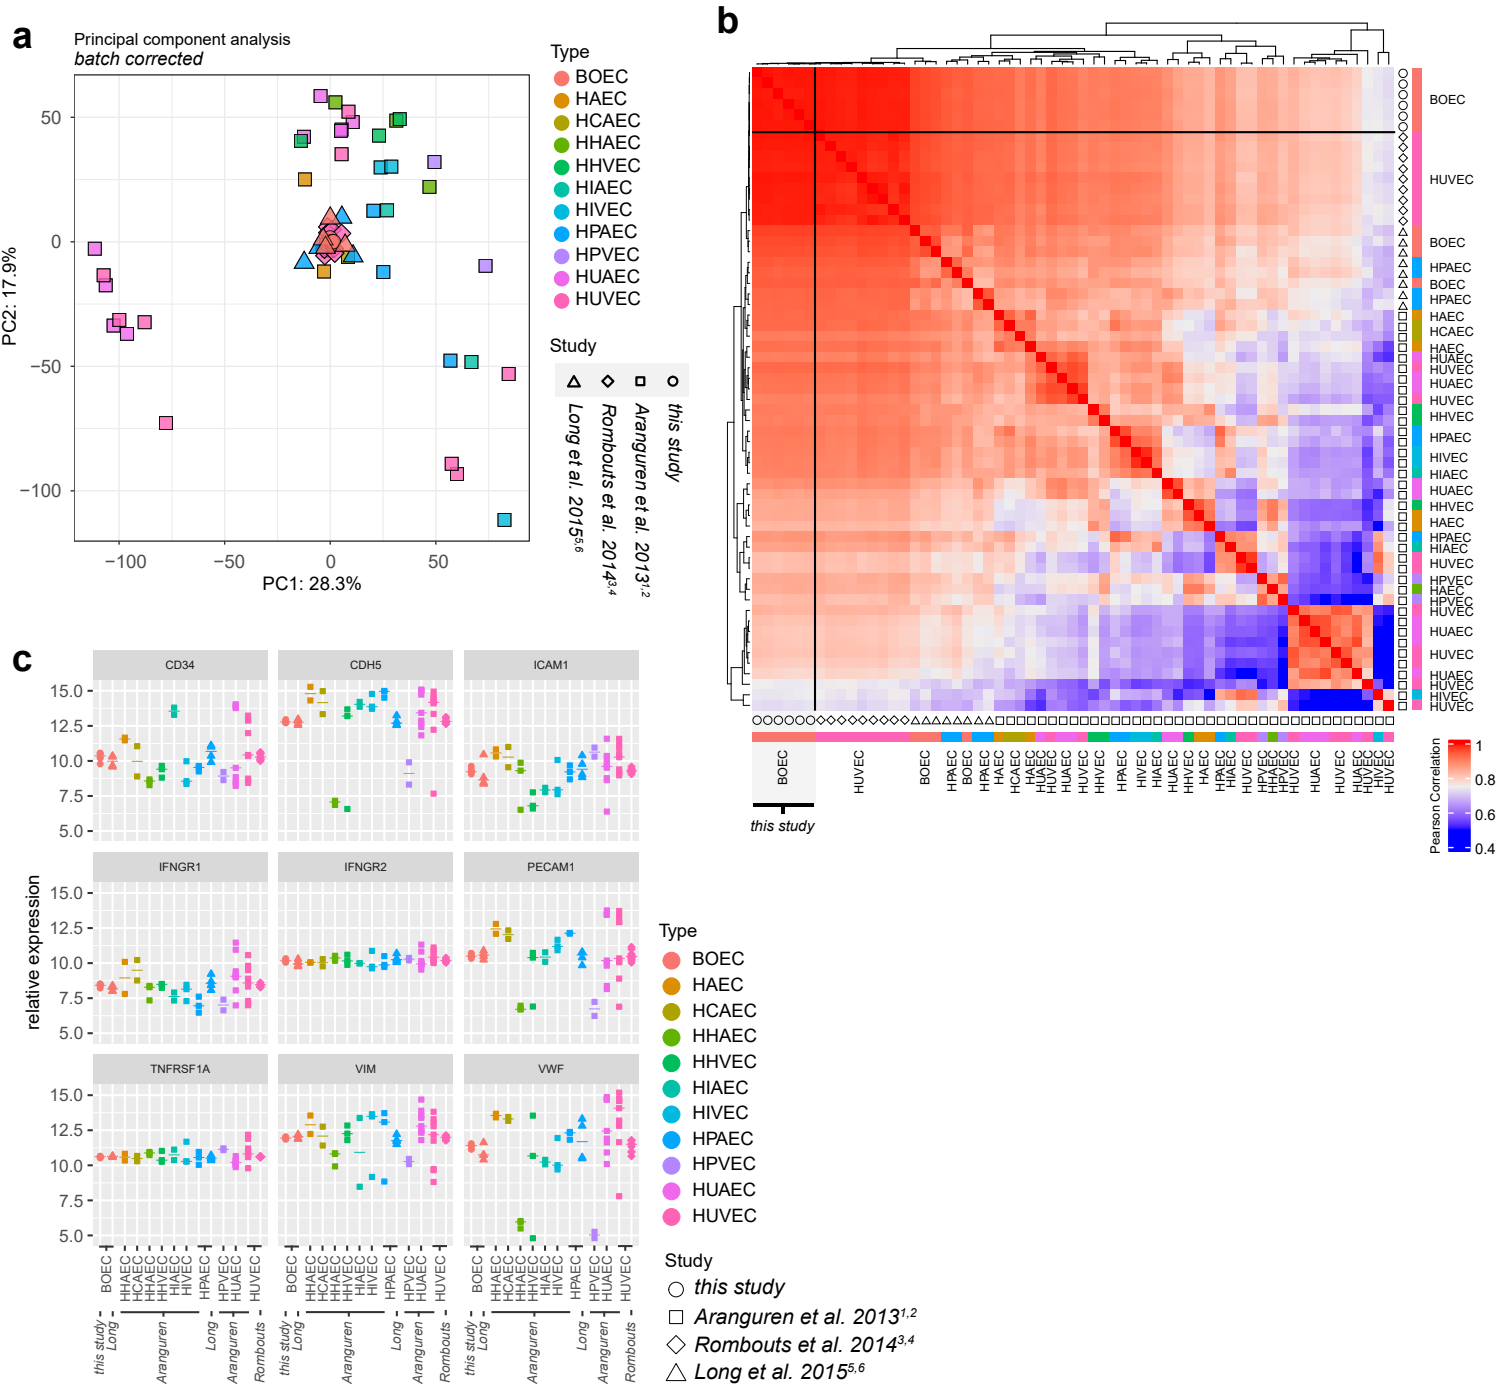

### Supplementary Figure 5: Transcriptome comparison of steady state EC types

**a** PCA plots of EC types from different studies after batch correction. BOEC (blood outgrowth) (n=6), HAEC (aortic) (n=4), HCAEC (cardiac artery) (n=2), HHVEC (hepatic vein) (n=2), HIAEC (iliac artery) (n=2), HIVEC (iliac vein) (n=3), HPAEC (pulmonary artery) (n=6), HPVEC (pulmonary vein) (n=2), HUAEC (umbilical artery) (n=8), HUVEC (umbilical vein) (n=17) and HHAEC (hepatic artery) (n=2). EC types are indicated by color, shape indicates study data was derived from, this study (circle), Aranguren et al. 2013 (square), Rombouts et al. 2014 (diamonds), Long et al. 2015 (triangle)

**b** Heatmap showing Pearson correlation between samples. Color gradient scale represents Pearson correlation. Samples in this study are highlighted by black lines.

**c** Relative RNA expression levels of key EC markers between EC types. Points indicate relative expression of each sample, bar indicates average of EC types within a study.

# Supplementary Figure 6

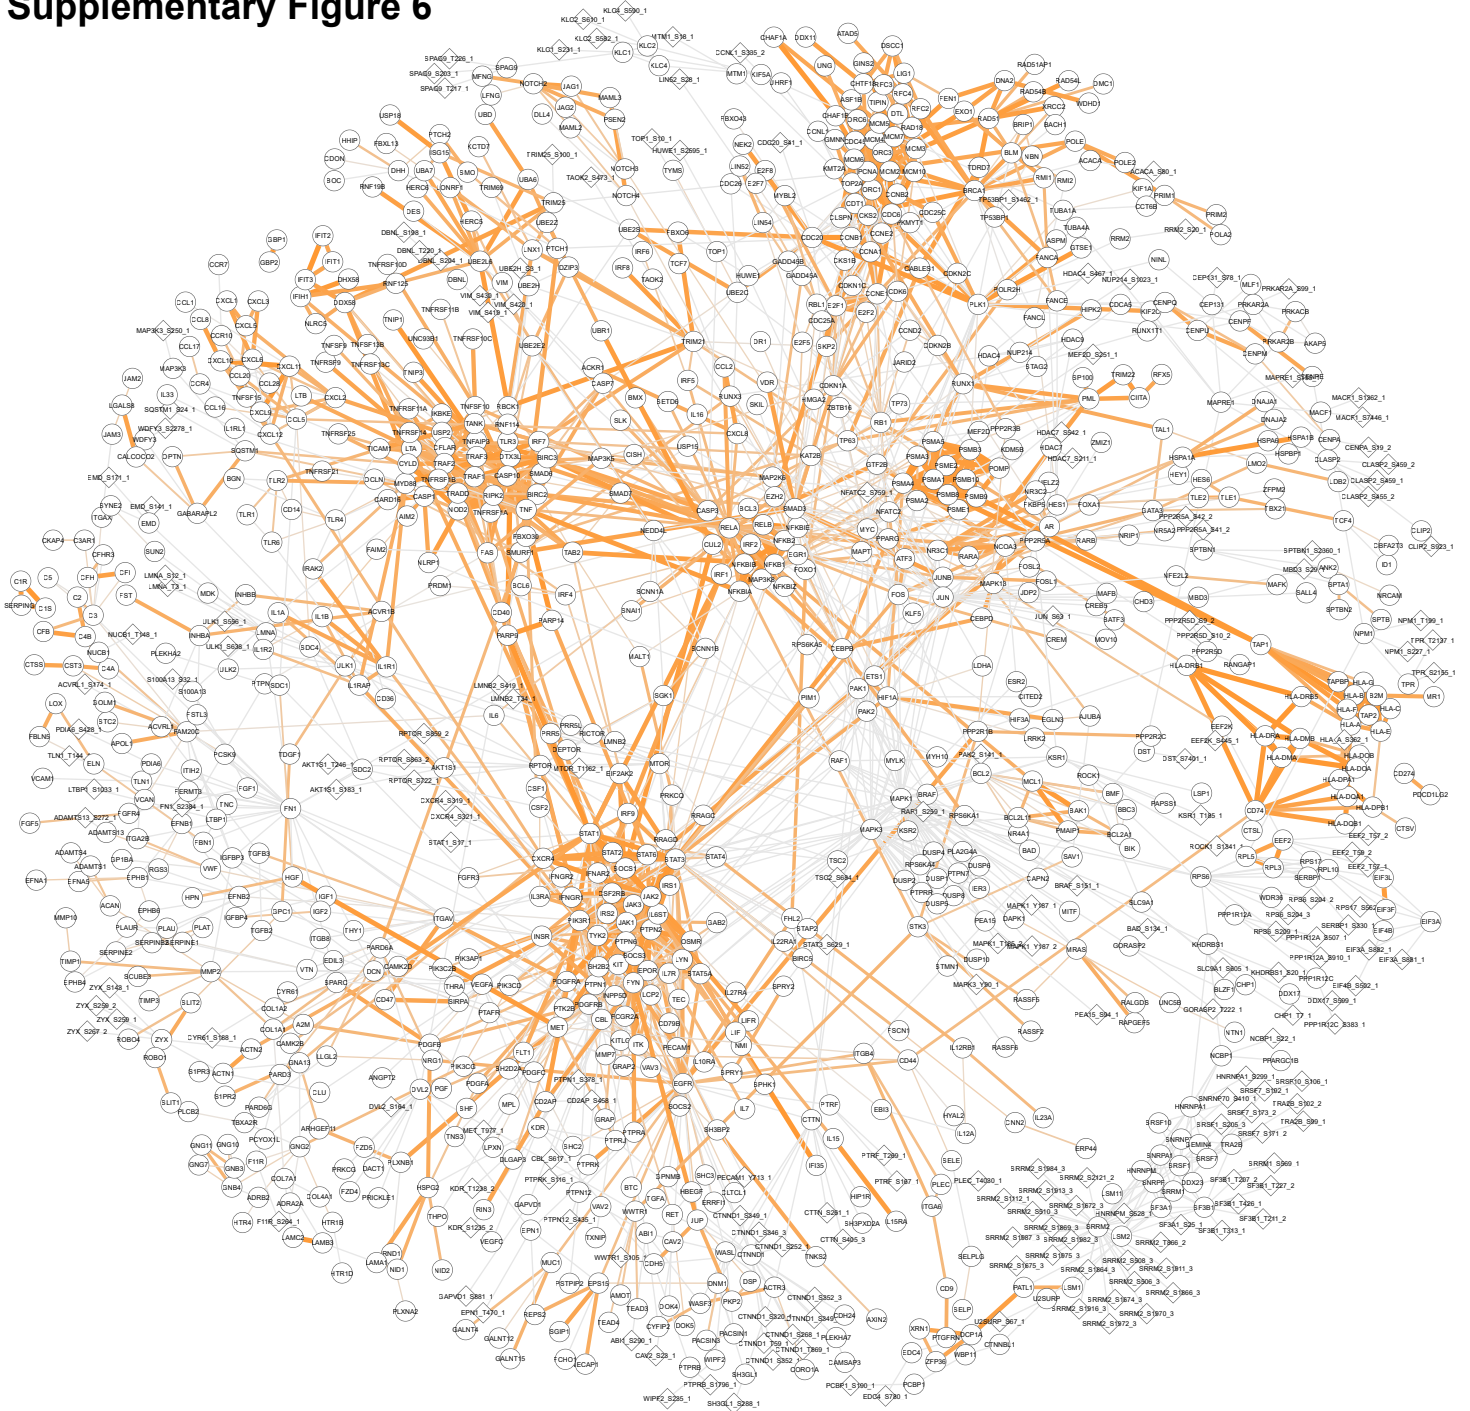

## Supplementary Figure 6: Inflammation network

Interaction network of all regulated mRNAs/proteins and phosphosites, filtered by high confidence interactions, nodes represent transcripts/proteins and phosphosites and are labeled with gene names and phosphosites.

## Supplementary Figure 7

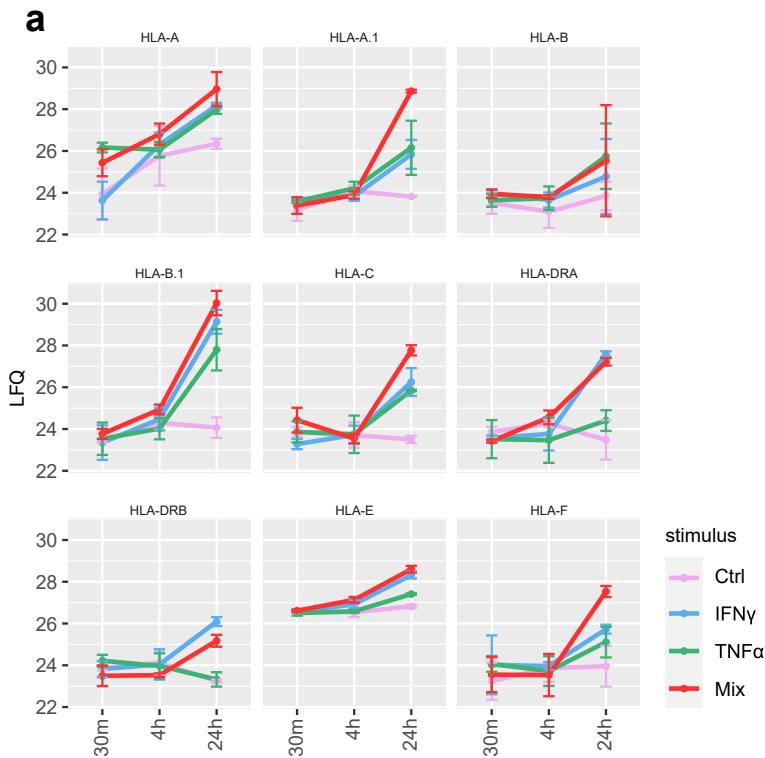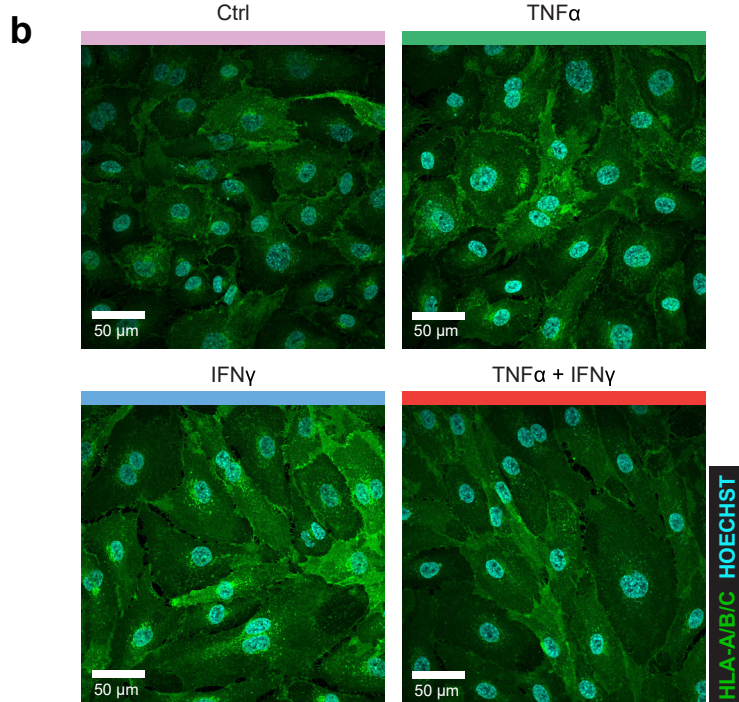

### Supplementary Figure 7: HLA expression endothelial cells

**a** Detected HLAs in LFQ proteomic workflow. Line plots of HLA LFQ levels after TNF $\alpha$  (green), IFN $\gamma$  (blue) and TNF $\alpha$  + IFN $\gamma$  (red) stimulation or unstimulated (pink). Circles indicate median, error bars show standard deviation (n = 3 biological replicates).

**b** MHC I distribution across EC cell membrane. Confocal images of HLA-A/B/C immunostaining in unstimulated ECs (Ctrl, pink) and stimulated with TNF $\alpha$  (green), IFN $\gamma$  (blue), or TNF $\alpha$  + IFN $\gamma$  (red). HLA-A/B/C staining is depicted in green, Hoechst staining in cyan. Representative experiment shown (n = 3 biologically independent experiments). Upper limit of the display range were adjusted equally across images for visualization purposes.

## Supplementary Figure 8

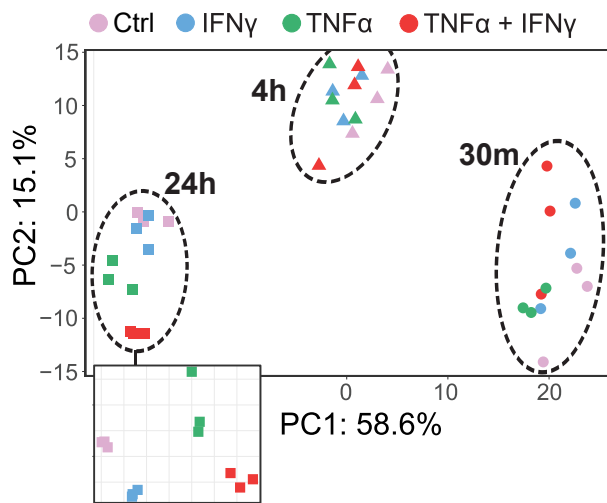

### Supplementary Figure 8: Variation in secreted proteins is induced by time and stimulus

PCA plot of secretomes of unstimulated BOECs (pink) or BOECs stimulated with TNF $\alpha$  (green), IFN $\gamma$  (blue) or TNF $\alpha$  + IFN $\gamma$  (red). Time of stimulation is indicated by shapes, 30 m (circle), 4h (triangle), 24h (square). Separate PCA of samples at 24h is shown in detail



## Supplementary table 1

| Proteins            | Peprtech Catalog | HNCG SYMBOL | Proteins       | Peprtech Catalog | HNCG SYMBOL |
|---------------------|------------------|-------------|----------------|------------------|-------------|
| 4-1BB               | 310-11           | TNFSF9      | IL-4           | 200-04           | IL4         |
| BAFF                | 310-13           | TNFSF13B    | IL-5           | 200-05           | IL5         |
| BCA-1               | 300-47           | CXCL13      | IL-6           | 200-06           | IL6         |
| BRAK                | 300-50           | CXCL14      | IL-7           | 200-07           | IL7         |
| CTACK               | 300-54           | CCL27       | IL-8           | 200-08M          | CXCL8       |
| CXCL16              | 300-55           | CXCL16      | IL-9           | 200-09           | IL9         |
| EGF                 | AF-100-15        | EGF         | IP-10          | 300-12           | CXCL10      |
| ENA-78              | 300-22           | CXCL5       | I-TAC          | 300-46           | CXCL11      |
| Eotaxin             | 300-21           | CCL11       | LD78 $\beta$   | 300-56           | CCL3L1      |
| Eotaxin-2           | 300-33           | CCL24       | LEC            | 300-44           | CCL16       |
| Eotaxin-3           | 300-48           | CCL26       | LIF            | 300-05           | LIF         |
| Exodus-2            | 300-35           | CCL21       | LIGHT          | 310-09B          | TNFSF14     |
| FGF-acidic          | 100-17A          | FGF1        | Lymphotactin   | 300-20           | XCL1        |
| FGF-basic           | 100-18B          | FGF2        | MCP-1          | 300-04           | CCL2        |
| Fractalkine         | 300-31           | CX3CL1      | MCP-2          | 300-15           | CCL8        |
| GCP-2               | 300-41           | CXCL6       | MCP-3          | 300-17           | CCL7        |
| G-CSF               | 300-23           | CSF3        | MCP-4          | 300-24           | CCL13       |
| GM-CSF              | 300-03           | CSF2        | M-CSF          | 300-25           | CSF1        |
| GRO- $\alpha$ /MGSA | 300-11           | CXCL1       | MDC            | 300-36           | CCL22       |
| GRO- $\beta$        | 300-39           | CXCL2       | MIF            | 300-69           | MIF         |
| GRO- $\gamma$       | 300-40           | CXCL3       | MIG            | 300-26           | CXCL9       |
| HCC-1               | 300-38           | CCL14       | MIP-1 $\alpha$ | 300-08           | CCL3        |
| HGF                 | 100-39H          | HGF         | MIP-1 $\beta$  | 300-09           | CCL4        |
| I-309               | 300-37           | CCL1        | MIP-3          | 300-29           | CCL23       |
| IFN- $\gamma$       | 300-02           | IFNG        | MIP-3 $\alpha$ | 300-29A          | CCL20       |
| IL-10               | 200-10           | IL10        | MIP-3 $\beta$  | 300-29B          | CCL19       |
| IL-11               | 200-11           | IL11        | MIP-5          | 300-43           | CCL15       |
| IL-12               | 200-12H          | IL12A       | NAP-2          | 300-14           | PPBP        |
| IL-13               | 200-13           | IL13        | Oncostatin     | 300-10           | OSM         |
| IL-15               | 200-15           | IL15        | Osteopontin    | 120-35           | SPP1        |
| IL-16               | 200-16           | IL16        | PF-4           | 300-16           | PF4         |
| IL-17A              | 200-17           | IL17A       | RANTES         | 300-06           | CCL5        |
| IL-17B              | 200-28           | IL17B       | Resistin       | 450-19           | RETN        |
| IL-17F              | 200-25           | IL17F       | sCD27          | 310-30           | CD70        |
| IL-1RA              | 200-01RA         | IL1RN       | sCD30          | 450-42           | TNFSF8      |
| IL-1 $\alpha$       | 200-01A          | IL1A        | sCD40          | 310-02           | CD40LG      |
| IL-1 $\beta$        | 200-01B          | IL1B        | SDF-1 $\beta$  | 300-28B          | CXCL12      |
| IL-2                | 200-02           | IL2         | sOX40          | 310-28           | TNFSF4      |
| IL-21               | 200-21           | IL21        | sRANK          | 310-01           | TNFSF11     |
| IL-22               | 200-22           | IL22        | TARC           | 300-30           | CCL17       |
| IL-23               | 200-23           | IL23A       | TECK           | 300-45           | CCL25       |
| IL-27               | 200-38           | IL27        | TGF- $\alpha$  | 100-16A          | TGFA        |
| IL-3                | 200-03           | IL3         | TGF- $\beta$ 1 | 100-21           | TGFB1       |
| IL-33               | 200-33           | IL33        | TGF- $\beta$ 2 | 100-35B          | TGFB2       |
| IL-34               | 200-34           | IL34        | TGF- $\beta$ 3 | 100-36E          | TGFB3       |
| IL-36 $\gamma$      | 200-36G          | IL36G       | TNF- $\alpha$  | 300-01A          | TNF         |

## Supplementary table 1

Overview of the cytokine library used in this study

## Supplementary table 2

| Cytokine library screen |     |                 | Cytokine library reruns |     |                 |
|-------------------------|-----|-----------------|-------------------------|-----|-----------------|
|                         | Sex | Age             |                         | Sex | Age             |
| MIX I                   | F   | 40              | MIX I                   | F   | 59 <sup>a</sup> |
|                         | M   | 58              |                         | M   | 49 <sup>d</sup> |
|                         | F   | 59 <sup>a</sup> |                         | F   | 40              |
| MIX II                  | M   | 50              | MIX II                  | M   | 58              |
|                         | F   | na <sup>b</sup> |                         | F   | 26 <sup>c</sup> |
|                         | F   | 33              |                         | M   | 41              |
| MIX III                 | na  | na              | MIX III                 | M   | 60              |
|                         | M   | 57              |                         | F   | 44              |
|                         | na  | na              |                         | F   | na <sup>b</sup> |
| Multi-omics experiment  |     |                 |                         |     |                 |
|                         | Sex | Age             |                         | Sex | Age             |
| MIX                     | F   | 59 <sup>a</sup> |                         |     |                 |
|                         | F   | 26 <sup>c</sup> |                         |     |                 |
|                         | M   | 49 <sup>d</sup> |                         |     |                 |
| Secretome experiment    |     |                 |                         |     |                 |
|                         | Sex | Age             |                         | Sex | Age             |
| MIX                     | M   | 63              |                         |     |                 |
|                         | F   | 48              |                         |     |                 |
|                         | M   | 48              |                         |     |                 |

## Supplementary table 2

Overview of age and sex of donors from which BOECs were isolated that were used in main experiments. x indicates the same donor. na indicates donor information was not available. In the cytokine library screen several conditions rerun. All cell culture plates used in both original and rerun samples, contained TNF $\alpha$  and IFN $\gamma$  stimulated conditions.

## Supplementary References

1. Aranguren, X. L. et al. Unraveling a novel transcription factor code determining the human arterial-specific endothelial cell signature. *Blood* 122, 3982–92 (2013).
2. Xabier Agirre, Xabier Aranguren, Victor Segura, Alberto Pascual-Montano, Felipe Prósper & Aernout Luttun (2014). UNRAVELING A NOVEL TRANSCRIPTION FACTOR CODE INDUCTIVE FOR THE HUMAN ARTERIAL-SPECIFIC ENDOTHELIAL CELL SIGNATURE. *BioStudies*, E-GEOD-43475. Retrieved from <https://www.ebi.ac.uk/biostudies/arrayexpress/studies/E-GEOD-43475>
3. Rombouts, C. et al. Transcriptomic profiling suggests a role for IGFBP5 in premature senescence of endothelial cells after chronic low dose rate irradiation. *Int. J. Radiat. Biol.* 90, 560–74 (2014).
4. Roel Quintens & An Aerts (2018). Microarray analysis of human umbilical vein endothelial cells (HUVECs) chronically irradiated with low dose-rate of ionizing radiation for one, three and six weeks. *BioStudies*, E-MTAB-6521. Retrieved from <https://www.ebi.ac.uk/biostudies/arrayexpress/studies/E-MTAB-6521>
5. Long, L. et al. Selective enhancement of endothelial BMPR-II with BMP9 reverses pulmonary arterial hypertension. *Nat. Med.* 21, 777–85 (2015).
6. Stefan Gräf & Nicholas Morrell (2015). BMP9\_BMPR2\_PAEC\_BOEC. *BioStudies*, E-MTAB-2495. Retrieved from <https://www.ebi.ac.uk/biostudies/arrayexpress/studies/E-MTAB-2495>
