# Supplementary material
Source: PubMed Central journal article supplement (PMC10185663)
Supplement: 42003_2023_4897_MOESM3_ESM.pdf [file 42003_2023_4897_MOESM3_ESM.pdf]

## Description of Additional Supplementary Files

**File name:** Supplementary Data 1

**Description:** Source proteomics data and analysis behind figure 1

**File name:** Supplementary Data 2

**Description:** Source proteomics data and analysis behind figure 2

**File name:** Supplementary Data 3

**Description:** Source proteomics data behind figure 3

**File name:** Supplementary Data 4

**Description:** Source (phospho-)proteomics & mRNA expression data and analysis behind figure 4-7

**File name:** Supplementary Data 5

**Description:** Source proteomics data and analysis behind figure 8
