# Supplementary material
Source: PubMed Central journal article supplement (PMC10185663)
Supplement: 42003_2023_4897_MOESM9_ESM.pdf [file 42003_2023_4897_MOESM9_ESM.pdf]

## Reporting Summary

Nature Portfolio wishes to improve the reproducibility of the work that we publish. This form provides structure for consistency and transparency in reporting. For further information on Nature Portfolio policies, see our [Editorial Policies](#) and the [Editorial Policy Checklist](#).

### Statistics

For all statistical analyses, confirm that the following items are present in the figure legend, table legend, main text, or Methods section.

- |                                     |                                                                                                                                                                                                                                                                                                |
|-------------------------------------|------------------------------------------------------------------------------------------------------------------------------------------------------------------------------------------------------------------------------------------------------------------------------------------------|
| n/a                                 | Confirmed                                                                                                                                                                                                                                                                                      |
| <input type="checkbox"/>            | <input checked="" type="checkbox"/> The exact sample size ( $n$ ) for each experimental group/condition, given as a discrete number and unit of measurement                                                                                                                                    |
| <input type="checkbox"/>            | <input checked="" type="checkbox"/> A statement on whether measurements were taken from distinct samples or whether the same sample was measured repeatedly                                                                                                                                    |
| <input type="checkbox"/>            | <input checked="" type="checkbox"/> The statistical test(s) used AND whether they are one- or two-sided<br><i>Only common tests should be described solely by name; describe more complex techniques in the Methods section.</i>                                                               |
| <input checked="" type="checkbox"/> | <input type="checkbox"/> A description of all covariates tested                                                                                                                                                                                                                                |
| <input type="checkbox"/>            | <input checked="" type="checkbox"/> A description of any assumptions or corrections, such as tests of normality and adjustment for multiple comparisons                                                                                                                                        |
| <input type="checkbox"/>            | <input checked="" type="checkbox"/> A full description of the statistical parameters including central tendency (e.g. means) or other basic estimates (e.g. regression coefficient) AND variation (e.g. standard deviation) or associated estimates of uncertainty (e.g. confidence intervals) |
| <input type="checkbox"/>            | <input checked="" type="checkbox"/> For null hypothesis testing, the test statistic (e.g. $F$ , $t$ , $r$ ) with confidence intervals, effect sizes, degrees of freedom and $P$ value noted<br><i>Give <math>P</math> values as exact values whenever suitable.</i>                            |
| <input checked="" type="checkbox"/> | <input type="checkbox"/> For Bayesian analysis, information on the choice of priors and Markov chain Monte Carlo settings                                                                                                                                                                      |
| <input checked="" type="checkbox"/> | <input type="checkbox"/> For hierarchical and complex designs, identification of the appropriate level for tests and full reporting of outcomes                                                                                                                                                |
| <input checked="" type="checkbox"/> | <input type="checkbox"/> Estimates of effect sizes (e.g. Cohen's $d$ , Pearson's $r$ ), indicating how they were calculated                                                                                                                                                                    |

*Our web collection on [statistics for biologists](#) contains articles on many of the points above.*

### Software and code

Policy information about [availability of computer code](#)

**Data collection** MS data collection was performed on a nanoscale C18 reverse chromatography coupled on-line to either an Orbitrap Fusion Lumos Tribrid or Orbitrap Fusion Tribrid mass spectrometer (Thermo Fisher). RNA sequencing data collection was performed by GeneWiz (Azenta life sciences)

**Data analysis** MS data was processed with Maxquant (1.6.2.10) using the Andromeda engine while RNA sequencing was processed with STAR (2.7.8a). Data was analysed in R (3.5.2) / Rstudio (1.1.456), for specific packages used see methods. Data was visualized in Cytoscape (3.8.0)

For manuscripts utilizing custom algorithms or software that are central to the research but not yet described in published literature, software must be made available to editors and reviewers. We strongly encourage code deposition in a community repository (e.g. GitHub). See the Nature Portfolio [guidelines for submitting code & software](#) for further information.

### Data

Policy information about [availability of data](#)

All manuscripts must include a [data availability statement](#). This statement should provide the following information, where applicable:

- Accession codes, unique identifiers, or web links for publicly available datasets
- A description of any restrictions on data availability
- For clinical datasets or third party data, please ensure that the statement adheres to our [policy](#)

The MS raw and output files have been deposited to the ProteomeXchange Consortium via the PRIDE partner repository with the dataset identifier PXD036582. mRNA sequencing data has been deposited in NCBI's Gene Expression Omnibus and is accessible through GE Series accession number (GSE213111).

## Human research participants

Policy information about [studies involving human research participants and Sex and Gender in Research](#).

|                             |                                                                                         |
|-----------------------------|-----------------------------------------------------------------------------------------|
| Reporting on sex and gender | <input type="text" value="No human research participants were involved in this study"/> |
| Population characteristics  | <input type="text" value="-"/>                                                          |
| Recruitment                 | <input type="text" value="-"/>                                                          |
| Ethics oversight            | <input type="text" value="-"/>                                                          |

Note that full information on the approval of the study protocol must also be provided in the manuscript.

## Field-specific reporting

Please select the one below that is the best fit for your research. If you are not sure, read the appropriate sections before making your selection.

Life sciences       Behavioural & social sciences       Ecological, evolutionary & environmental sciences

For a reference copy of the document with all sections, see [nature.com/documents/nr-reporting-summary-flat.pdf](https://www.nature.com/documents/nr-reporting-summary-flat.pdf)

## Life sciences study design

All studies must disclose on these points even when the disclosure is negative.

|                 |                                                                                                                                                                        |
|-----------------|------------------------------------------------------------------------------------------------------------------------------------------------------------------------|
| Sample size     | <input type="text" value="Cells from 19 different donors were used, pooled per three for experiments. Stimulations were performed in 3 biological replicates"/>        |
| Data exclusions | <input type="text" value="No data was excluded"/>                                                                                                                      |
| Replication     | <input type="text" value="Proteomic signatures of unstimulated, TNFa and IFNγ stimulated cells were reproducible throughout experiments and endothelial cell pools."/> |
| Randomization   | <input type="text" value="Endothelial cell pools were made randomly"/>                                                                                                 |
| Blinding        | <input type="text" value="No blinding was applied"/>                                                                                                                   |

## Reporting for specific materials, systems and methods

We require information from authors about some types of materials, experimental systems and methods used in many studies. Here, indicate whether each material, system or method listed is relevant to your study. If you are not sure if a list item applies to your research, read the appropriate section before selecting a response.

### Materials & experimental systems

| n/a                                 | Involved in the study                                     |
|-------------------------------------|-----------------------------------------------------------|
| <input type="checkbox"/>            | <input checked="" type="checkbox"/> Antibodies            |
| <input type="checkbox"/>            | <input checked="" type="checkbox"/> Eukaryotic cell lines |
| <input checked="" type="checkbox"/> | <input type="checkbox"/> Palaeontology and archaeology    |
| <input checked="" type="checkbox"/> | <input type="checkbox"/> Animals and other organisms      |
| <input checked="" type="checkbox"/> | <input type="checkbox"/> Clinical data                    |
| <input checked="" type="checkbox"/> | <input type="checkbox"/> Dual use research of concern     |

### Methods

| n/a                                 | Involved in the study                           |
|-------------------------------------|-------------------------------------------------|
| <input checked="" type="checkbox"/> | <input type="checkbox"/> ChIP-seq               |
| <input checked="" type="checkbox"/> | <input type="checkbox"/> Flow cytometry         |
| <input checked="" type="checkbox"/> | <input type="checkbox"/> MRI-based neuroimaging |

## Antibodies

|                 |                                                                                                                                                                                                                                                                                                                                |
|-----------------|--------------------------------------------------------------------------------------------------------------------------------------------------------------------------------------------------------------------------------------------------------------------------------------------------------------------------------|
| Antibodies used | <input type="text" value="anti HLA-DR, L243 (InVivoMAb, BE0306, 688119S1), anti pan-HLA-A,-B,-C, W6/32 (ATCC, HB-95), secondary Alexa Fluor 488 conjugated antibody (Invitrogen, A21200, 1696214)"/>                                                                                                                           |
| Validation      | <input type="text" value="HLA-DR (L243)&lt;br/&gt;RRID: AB_2736986, the antibody registry&lt;br/&gt;pan HLA-A,-B,-C (W6/32 )&lt;br/&gt;-Brodsky FM, Parham P. Monomorphic anti-HLA-A,B,C monoclonal antibodies detecting molecular subunits and combinatorial determinants. J. Immunol. 128: 129-135, 1982. PubMed: 6172474"/> |

## Eukaryotic cell lines

Policy information about [cell lines and Sex and Gender in Research](#)

|                                                                      |                                                                                                                                                                                                                                                               |
|----------------------------------------------------------------------|---------------------------------------------------------------------------------------------------------------------------------------------------------------------------------------------------------------------------------------------------------------|
| Cell line source(s)                                                  | Blood derived endothelial cells were isolated from healthy donors (Martin-Ramirez, J. et al., Establishment of outgrowth endothelial cells from peripheral blood. Nat. Protoc. 7, 1709–15 (2012)). For overview of cell source donor see supplemental table 2 |
| Authentication                                                       | Endothelial cell marker VWF expression was checked by immunostaining for all isolated cells                                                                                                                                                                   |
| Mycoplasma contamination                                             | Cells were tested negative for mycoplasma after isolation                                                                                                                                                                                                     |
| Commonly misidentified lines<br>(See <a href="#">ICLAC</a> register) | This study does not use commonly misidentified cell lines                                                                                                                                                                                                     |
